# Supplementary material for: Genetic landscape of rare autoinflammatory disease variants in Qatar and Middle Eastern populations through the integration of whole-genome and exome datasets
Source: bioRxiv or medRxiv preprint supplement (doi:10.1101/2020.08.10.20171363), 2021-04-08
Supplement: Supplementary file [file 2020.08.10.20171363-2.pdf]

**Genetic landscape of rare autoinflammatory disease variants in Qatar and Middle Eastern populations through the integration of genomic datasets**

Parul Sharma, Abhinav Jain, Vinod Scaria

| Genes            | Clinvar  | Infever   | HGMD      |
|------------------|----------|-----------|-----------|
| AP1S3            | 0        | 0         | 2         |
| NLRP3            | 0        | 33        | 4         |
| TNFRSF1A         | 1        | 0         | 2         |
| MVK              | 1        | 16        | 3         |
| IL1RN            | 0        | 5         | 0         |
| LPIN2            | 0        | 0         | 6         |
| IL36RN           | 0        | 1         | 1         |
| CARD14           | 0        | 8         | 1         |
| PSTPIP1          | 0        | 3         | 1         |
| NOD2             | 1        | 27        | 14        |
| NLRP12           | 1        | 0         | 5         |
| PSMB8            | 0        | 0         | 1         |
| PSMB4            | 0        | 0         | 0         |
| PSMB9            | 0        | 0         | 2         |
| PSMA3            | 0        | 0         | 0         |
| POMP             | 0        | 0         | 0         |
| PRF1             | 0        | 0         | 7         |
| STX11            | 0        | 0         | 0         |
| STXBP2           | 0        | 0         | 3         |
| MUNC13 or UNC13D | 0        | 0         | 5         |
| RAB27A           | 1        | 0         | 1         |
| SH2D1A           | 0        | 0         | 0         |
| BIRC4 or XIAP    | 0        | 0         | 0         |
| PLCG2            | 0        | 0         | 0         |
| SLC29A3          | 0        | 0         | 0         |
| CECR1 or ADA2    | 0        | 0         | 0         |
| IL10             | 0        | 0         | 0         |
| IL10RA           | 0        | 1         | 1         |
| IL10RB           | 0        | 0         | 0         |
| NLRC4            | 0        | 0         | 0         |
| NLRP7            | 0        | 0         | 9         |
| OTULIN           | 0        | 0         | 0         |
| RBCK1            | 0        | 0         | 0         |
| SH3BP2           | 0        | 1         | 0         |
| TMEM173          | 0        | 0         | 2         |
| TNFAIP3          | 0        | 0         | 2         |
| TNFRSF11A        | 0        | 0         | 0         |
| <b>Total</b>     | <b>5</b> | <b>95</b> | <b>72</b> |
